# Supplementary material
Source: PubMed Central journal article supplement (PMC4751928)
Supplement: SD4.pdf [file SD4.pdf]

## SUPPLEMENTAL METHODS

**Chikungunya virus-specific real-time reverse-transcription polymerase chain reaction.** The presence of chikungunya virus (CHIKV) mRNA was determined using a TaqMan real-time reverse-transcription polymerase chain reaction (RT-PCR) assay as described<sup>1</sup> with primer/probe sets designed to detect Asian and East/Central/South African (ECSA) genotypes of CHIKV (R.S. Lanciotti, personal communication): primers, forward (CHIKV 3855) 5'-GAGCATACGGTTACGCAGATAG-3', reverse (CHIKV 3957-Asian) 5'-TACTGGTGATACATGGTGGTTTC-3', and (CHIKV 3957-ECSA) 5'-TGCTGGTGA CACATGGTGGTTTC-3'; probes, (CHIKV 3886 FAM-Asian) 5'-FAM-ACGAGTAATCTGCGTACTGGGACGTA-BHQ1-3' and (CHIKV 3886 FAM- ECSA) 5'-FAM-ACGAGTCATCTGCGTATTGGGACGCA-BHQ1-3'.

**Sanger sequencing.** Viral RNA was extracted from 140  $\mu$ L of cell culture supernatant or 140  $\mu$ L of patient serum using the QIAamp Viral RNA Mini Kit (Qiagen, Valencia, CA) according to the manufacturer's protocol, and RNA was eluted in 60  $\mu$ L of RNase-free water. Primers for amplifying and sequencing the *E1* gene were designed according to reference genome British Virgin Islands 99659 (GenBank accession no. KJ451624). The SuperScript III One-Step RT-PCR System (Invitrogen, Carlsbad, CA) was used for reverse transcription of viral RNA and subsequent amplification of viral complementary DNA (cDNA). Specifically, 5  $\mu$ L of extracted viral RNA was denatured at 90°C for 1 minute and immediately placed on ice. Subsequently, 0.25  $\mu$ L each of forward and reverse primers (Supplemental Table 2), 11.3  $\mu$ L of RNase-free water, 17.5  $\mu$ L of 2X Reaction Buffer (Invitrogen), and 0.7  $\mu$ L of SuperScript III RT/Platinum Taq High Fidelity Enzyme Mix (Invitrogen) were added to the denatured RNA. Viral RNA was reverse transcribed (50°C for 60 minutes), and the resulting cDNA was amplified via one cycle of denaturation (94°C for 2 minutes), 33–35 cycles of denaturation (94°C for 15 seconds), annealing (55–57°C for 30 seconds), and extension (68°C for 3 minutes), and a final extension (68°C for 10 minutes). Amplicons from each sample were visualized using a 1% agarose gel to confirm the presence of a ~2.4-kb DNA fragment. The PCR product was sequenced via the Sanger method at the University of California, Berkeley's DNA Sequencing Facility (<https://mcb.berkeley.edu/barker/dnaseq/home>) using the primers listed in Supplemental Table 2.

**Deep sequencing.** Three autochthonous serum samples from October 2014 were deep sequenced. For each sample, cDNA was synthesized as follows: 4  $\mu$ L of 5X first-strand

buffer, 2  $\mu$ L dithiothreitol (DTT; 0.1 M), 2  $\mu$ L deoxynucleotide triphosphates (dNTPs) (10 mM), 1  $\mu$ L SUPERase•In RNase Inhibitor (Life Technologies, Carlsbad, CA), 1.5  $\mu$ L Superscript Reverse Transcriptase III (Invitrogen), 0.5  $\mu$ L random hexamers (1.1  $\mu$ g/ $\mu$ L; Life Technologies), and 3  $\mu$ L RNase-free water were added to 6  $\mu$ L denatured nucleic acids. Initial annealing of hexamers was performed at 25°C for 2 minutes, and RNA was reverse transcribed at 42°C for 60 minutes. The reaction was inactivated via a 5-minute incubation at 95°C. Next, cDNA was amplified using multiple displacement amplification (MDA). In brief, two MDA reactions were set up for each sample, with each MDA reaction containing 10  $\mu$ L cDNA, 2  $\mu$ L dNTP mix (25 mM), 5  $\mu$ L of 10X phi29 reaction buffer (New England Biolabs, Ipswich, MA), 2.75  $\mu$ L random hexamers, 1.25  $\mu$ L DTT (100 mM), 30  $\mu$ L RNase-free water, and 1  $\mu$ L bovine serum albumin (10 mg/mL). DNA was denatured by heating the reaction at 95°C for 5 minutes, followed by immediate placement on ice. Subsequently, 1.25  $\mu$ L phi29 polymerase was added to each tube, and reactions were incubated at 30°C for 4 hours. Reactions for each sample were combined, and amplified DNA was purified using the QIAquick PCR Purification kit (Qiagen) as described in the manufacturer's protocol. DNA was eluted in 30  $\mu$ L Buffer EB (Qiagen). Libraries for high-throughput sequencing were prepared from 1.5 ng of purified DNA using the Nextera XT DNA Library Prep Kit (Illumina, San Diego, CA) according to the recommended protocol. Libraries were pooled in equimolar ratios and sequenced using the HiSeq2000 platform (Illumina) at the QB3 facility located at the University of California, Berkeley (<http://qb3.berkeley.edu/qb3/gsl/services-lp.cfm>) to generate 100-bp reads. Reads for each sample were mapped to full-length CHIKV sequences from the National Center for Biotechnology Information (NCBI) using the "Bowtie2" software.<sup>2</sup> "Samtools"<sup>3</sup> and in-house Python scripts (Python Software Foundation) were used to generate pileups and consensus nucleotide.

## SUPPLEMENTAL REFERENCES

1. Lanciotti RS, Kosoy OL, Laven JJ, Panella AJ, Velez JO, Lambert AJ, Campbell GL, 2007. Chikungunya virus in US travelers returning from India, 2006. *Emerg Infect Dis* 13: 764–767.
2. Langmead B, Salzberg SL, 2012. Fast gapped-read alignment with Bowtie 2. *Nat Methods* 9: 357–359.
3. Li H, Handsaker B, Wysoker A, Fennell T, Ruan J, Homer N, Marth G, Abecasis G, Durbin R; Genome Project Data Processing Subgroup, 2009. The Sequence Alignment/Map format and SAMtools. *Bioinformatics* 25: 2078–2079.

SUPPLEMENTAL TABLE 1  
List of Nicaraguan CHIKV samples with Sanger *E1* sequencing results

| Strain name | GenBank no. | Sample type | Case type     | Source (study)        | Date of symptom onset (month/day/year) | Date of sample collection (month/day/year) | Hospitalized (Y/N) | <i>E1</i> sequence homology with BVL_99659† |                          |
|-------------|-------------|-------------|---------------|-----------------------|----------------------------------------|--------------------------------------------|--------------------|---------------------------------------------|--------------------------|
|             |             |             |               |                       |                                        |                                            |                    | nucleotide                                  | Amino acid               |
| 7333        | KT192708    | Isolate     | Imported      | National surveillance | 08/18/2014                             | 08/19/2014                                 | Y                  | 100%                                        | –                        |
| 7334        | KT192709    | Isolate     | Imported      | National surveillance | 08/18/2014                             | 08/19/2014                                 | Y                  | 100%                                        | –                        |
| 7444        | KT192710    | Isolate     | Imported      | National surveillance | 08/19/2014                             | 08/21/2014                                 | N                  | 100%                                        | –                        |
| 7745        | KT192711    | Isolate     | Imported      | National surveillance | 08/20/2014                             | 08/24/2014                                 | Y                  | 100%                                        | –                        |
| 7975        | KT192712    | Isolate     | Imported      | National surveillance | 08/24/2014                             | 08/26/2014                                 | N                  | 100%                                        | –                        |
| 5872        | KT192713    | Isolate     | Autochthonous | Cohort                | 10/16/2014                             | 10/16/2014                                 | N                  | 100%                                        | –                        |
| 4548        | KT192714    | Isolate     | Autochthonous | Cohort                | 10/20/2014                             | 10/20/2014                                 | N                  | 100%                                        | –                        |
| 1686        | KT192715    | Isolate     | Autochthonous | Cohort                | 10/21/2014                             | 10/21/2014                                 | Y                  | 100%                                        | –                        |
| 11539       | KT192716    | Serum       | Autochthonous | National surveillance | 10/29/2014                             | 10/31/2014                                 | Y                  | 100%                                        | –                        |
| 11540*      | KT192717    | Serum       | Autochthonous | National surveillance | 10/29/2014                             | 10/31/2014                                 | Y                  | 100%                                        | –                        |
| 1758        | KT192718    | Isolate     | Autochthonous | Hospital              | 11/3/2014                              | 11/5/2014                                  | Y                  | C10415T; G11130T                            | E1-A145V; E1-P383 silent |
| 1507        | KT192719    | Isolate     | Autochthonous | Cohort                | 11/9/2014                              | 11/9/2014                                  | N                  | 100%                                        | –                        |
| 1771        | KT192720    | Isolate     | Autochthonous | Hospital              | 11/12/2014                             | 11/13/2014                                 | Y                  | 100%                                        | –                        |
| 1086        | KT192721    | Isolate     | Autochthonous | Cohort                | 11/26/2014                             | 11/26/2014                                 | N                  | T10080C                                     | E1-L33 silent            |
| 4184        | KT192722    | Isolate     | Autochthonous | Cohort                | 11/26/2014                             | 11/27/2014                                 | N                  | T11076C                                     | E1-F365 silent           |
| 1800        | KT192723    | Isolate     | Autochthonous | Hospital              | 12/1/2014                              | 12/3/2014                                  | Y                  | G10665A                                     | E1-T228 silent           |
| 1802        | KT192724    | Isolate     | Autochthonous | Hospital              | 12/1/2014                              | 12/3/2014                                  | N                  | G10852A; G11130T                            | E1-V291I; E1-P383 silent |
| 1803        | KT192725    | Isolate     | Autochthonous | Hospital              | 12/2/2014                              | 12/4/2014                                  | Y                  | 100%                                        | –                        |
| 1806        | KT192726    | Isolate     | Autochthonous | Hospital              | 12/8/2014                              | 12/9/2014                                  | Y                  | 100%                                        | –                        |
| 1807        | KT192727    | Isolate     | Autochthonous | Hospital              | 12/8/2014                              | 12/9/2014                                  | Y                  | T11076C                                     | E1-F365 silent           |
| 4367        | KT192728    | Isolate     | Autochthonous | Cohort                | 12/23/2014                             | 12/24/2014                                 | N                  | 100%                                        | –                        |
| 3370        | KT192729    | Isolate     | Autochthonous | Cohort                | 12/25/2014                             | 12/26/2014                                 | N                  | 100%                                        | –                        |
| 4784        | KT192730    | Isolate     | Autochthonous | Cohort                | 1/3/2015                               | 1/4/2015                                   | N                  | 100%                                        | –                        |
| 1817        | KT192731    | Isolate     | Autochthonous | Hospital              | 1/5/2015                               | 1/6/2015                                   | Y                  | A10465G                                     | E1-I162V                 |
| 1820        | KT192732    | Isolate     | Autochthonous | Hospital              | 1/7/2015                               | 1/8/2015                                   | Y                  | G11130T                                     | E1-P383 silent           |
| 7448        | KT192733    | Isolate     | Autochthonous | Cohort                | 2/4/2015                               | 2/5/2015                                   | N                  | G11130T                                     | E1-P383 silent           |
| 1851        | KT192734    | Isolate     | Autochthonous | Hospital              | 2/8/2015                               | 2/10/2015                                  | Y                  | 100%                                        | –                        |
| 7763        | KT192735    | Isolate     | Autochthonous | Cohort                | 2/15/2015                              | 2/15/2015                                  | N                  | T11076C                                     | E1-F365 silent           |
| 1852        | KT192736    | Isolate     | Autochthonous | Hospital              | 2/16/2015                              | 2/18/2015                                  | Y                  | G11130T                                     | E1-P383 silent           |
| 1853        | KT192737    | Isolate     | Autochthonous | Hospital              | 2/16/2015                              | 2/18/2015                                  | Y                  | 100%                                        | –                        |
| 1854        | KT192738    | Isolate     | Autochthonous | Hospital              | 2/18/2015                              | 2/20/2015                                  | Y                  | 100%                                        | –                        |
| 7050        | KT192739    | Isolate     | Autochthonous | Cohort                | 3/20/2015                              | 3/21/2015                                  | N                  | 100%                                        | –                        |
| 7676        | KT192740    | Isolate     | Autochthonous | Cohort                | 4/21/2015                              | 4/22/2015                                  | N                  | T11076C                                     | E1-F365 silent           |

CHIKV = chikungunya virus; Y = yes; N = no.

\*Full-length genome obtained from Hi-Seq; sequence available from GenBank, accession no. KT192707.

†Nucleotide numbering is according to BritishVirginIslands/99659/KJ451624/2014.

SUPPLEMENTAL TABLE 2  
CHIKV primers used for RT-PCR and Sanger sequencing

| Primer*            | Sequence                     | RT-PCR | Sequencing |
|--------------------|------------------------------|--------|------------|
| CHIK_CW_9544-63 f  | TGGCCGCAGTTATCCACAAA         | X      | X          |
| CHIK_CW_10341-60 f | AGCATACAGGGCTCATACCG         |        | X          |
| CHIK_CW_11143-60 f | GTCAATTACCCGGCGTCA           |        | X          |
| CHIK_CW_11164-83 f | ACCACCTCGGGGTCCAAGA          |        | X          |
| CHIK_CW_11954-27 r | AGAGTTCGGTATGCTATGCCTACATCTC | X      | X          |

CHIKV = chikungunya virus; RT-PCR = reverse-transcription polymerase chain reaction.

\*Primers were designed based on the reference genome of CHIKV strain 99659 from the British Virgin Islands.
